# Supplementary material for: Environmental factors in school classrooms: How they influence visual task demand on children
Source: PLoS One. 2019 Jan 10;14(1):e0210299. doi: 10.1371/journal.pone.0210299 (PMC6328081; doi:10.1371/journal.pone.0210299)
Supplement: S1 Table — (XLSX) [file pone.0210299.s002.xlsx]

## Sheet: Sheet1
School_Code	Distance threshold VA demand in logMAR	Chalkboard Illuminance in lux	Visual Acuity demand (VAD)_Front desk in logMAR	VAD_Middle desk in logMAR	VAD_Last desk in logMAR
1	0.204055	372	0.48221	0.309582	0.0740549
2	0.354649	430	0.342033	0.285918	0.225793
3	0.602833	56	0.480567	0.411854	0.343398
4	0.391278	136	0.300847	0.224087	0.134518
5	0.622675	131	0.690164	0.475632	0.332675
6	0.282429	40	0.194375	0.103477	0.0283513
7	0.267943	289	0.366261	0.201575	0.137943
8	0.53649	89	0.389155	0.271518	0.24649
9	0.0740957	55	0.132549	-0.0420542	-0.215904
10	0.480974	202	0.634963	0.437159	0.350974
11	0.283768	164	0.391882	0.278706	0.169373
12	0.19126	572	0.315831	0.224241	0.0612597
13	0.519457	105	0.377256	0.264219	0.229457
14	0.321523	146	0.375582	0.224318	0.07735
15	0.273252	82	0.258725	0.159342	-0.0167484
16	0.469145	186	0.601182	0.466487	0.363827
17	0.540855	124	0.439176	0.361881	0.308637
18	0.217735	102	0.0704012	-0.0472376	-0.0722655
19	0.246459	28	0.241096	0.16731	-0.0435415
20	0.385225	244	0.502269	0.383582	0.273486
21	0.25546	23	0.288643	0.158356	0.0198929
22	0.448356	29	0.342269	0.249213	0.172621
23	0.25546	73	0.302007	0.106613	-0.0345403
24	0.0716069	230	0.265565	0.102757	-0.0393699
25	0.382677	97	0.359997	0.172773	0.0926775
26	0.0681464	137	-0.0379376	-0.130995	-0.207589
27	0.406829	45	0.535025	0.31178	0.116829
28	0.264071	39	0.348861	0.176454	0.0237763
29	0.115988	54	0.0246441	-0.0687772	-0.121483
